# Supplementary material for: Caveolin-1 Limits the Contribution of BKCa Channel to MCF-7 Breast Cancer Cell Proliferation and Invasion
Source: MDPI journal article supplement (doi:10.3390/ijms151120706), 2014-11-12

## Supplementary Information

**Figure S1.** Quantification of protein levels in MCF-7 cells transfected with (A) siCav-1 or (B) siBKCa and their corresponding scrambled siRNAs (siControl). The values are normalized by  $\beta$ -actin and expressed relative to that of control (100%), \*  $p < 0.05$ .

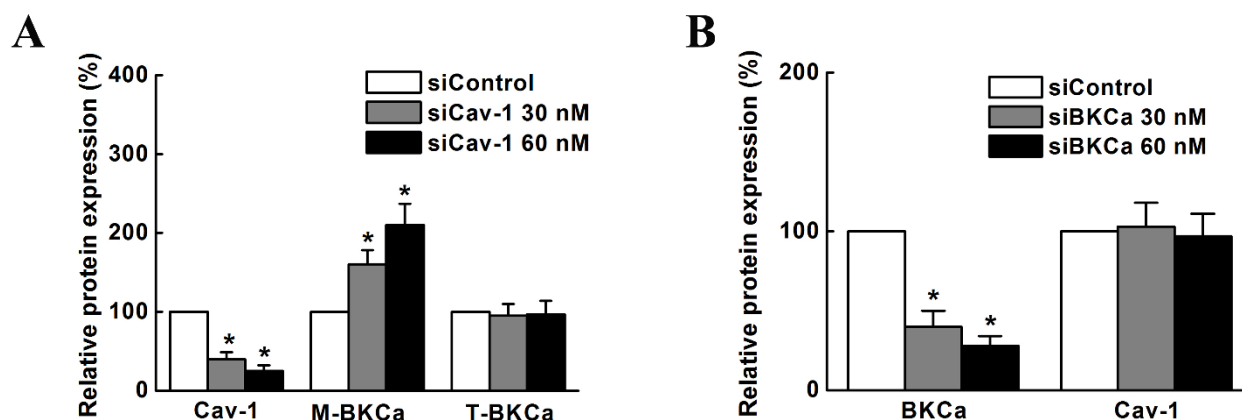

**Figure S2.** Quantification of protein levels in MCF-7 cells transfected with (A) pCav-1 or (B) pBKCa and their corresponding vectors. The values are normalized by  $\beta$ -actin and expressed relative to that of control (100%), \*  $p < 0.05$ .

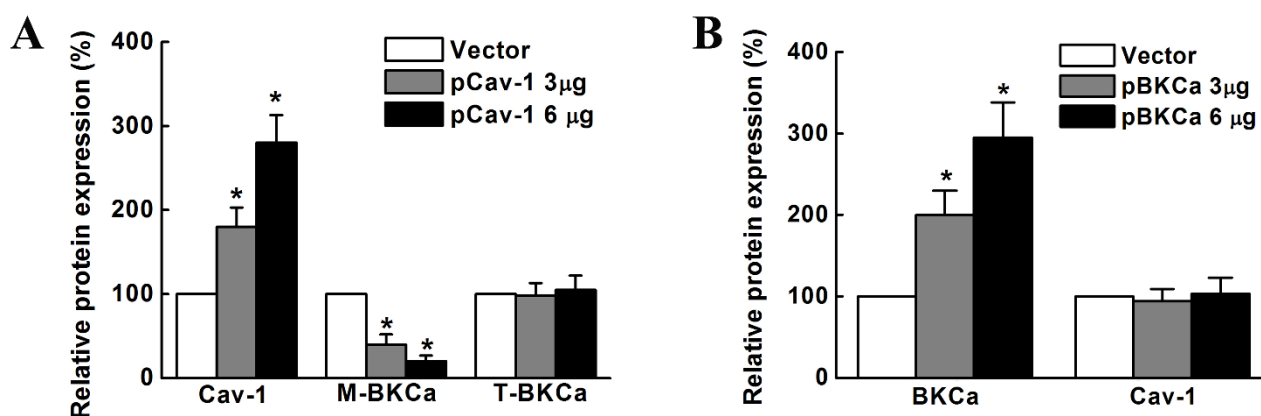

Supplement: s1 [file s1]
